# Supplementary material for: A New Model about the Role of Satellite DNA in Forming Higher-Order Chromatin Structure
Source: Research Square preprint supplement (doi:10.21203/rs.3.rs-7224262/v1), 2025-07-29
Supplement: Supplementary file 1 [file 36dc32a5703327cbc8a96bc5.docx]

**Table S1. Specific oligo probes for arrays -A2 and +A3**

| Oligo probe name | Oligo probe sequence | Original sequence for designing olig probe |
| --- | --- | --- |
| Oligo119.2-A2 | AAAGCGATTTCCATGGTTGACGAACCCCAAGGT | TCAACACTCACAGTTTTGGCCGATTCTGGCCTGTTTCGTGGACTATTACTCACCGTTTTGGGGTCCCAAAGCGATTTCCATGGTTGACGAACCCCAAGGTGCGTTTACGTGTCGGTCA |
| Oligo119.2+A3 | GGAG TGATTTCCAT GATTAACGAA CCCCGGG | TGCGTTTACGTGTCGGTCATCAACACTCACAGTTTTGGCCGATTCTGGCCCGTTTCGTGGACTATTACTCACTGTTTTGGGGTCCCGGAGTGATTTCCATGATTAACGAACCCCGGG |

**Table S2. oligo probes for SC-FISH.**

| Probe | In_seq | Chromosome | Start | End | F primer | R primer |
| --- | --- | --- | --- | --- | --- | --- |
| S-A1 | -A1-1 | chr3B | 1398742 | 1401541 | TGACCTTGGATTACTTTC | ATCCTTCTCGGTACTTAT |
| -A1-2 | chr3B | 1401509 | 1404488 | TTAGGCAAAGGTGATGTT | CCTCGGAGTCCTCAGAAA |
| -A1-3 | chr3B | 1404906 | 1406397 | AGTCTTTTGTGACGCTAC | CTCTGGTATTCACCCTTA |
| S-A2.1 | -A2.1-1 | chr3B | 1777673 | 1779976 | GCATCTTAACCTTTAGGC | CGAGGGAGACCAAGTCGC |
| -A2.1-2 | chr3B | 1782318 | 1785022 | CGCATCCATACCTGCTCG | CACATCAAAGGCAACATAA |
| S-A2.2 | -A2.2-1 | chr3B | 2153660 | 2155918 | TCTGGTTGTTGATGCGTC | TTTTGAAATGTTGACCAA |
| -A2.2-2 | chr3B | 2157202 | 2159615 | TGGCCAGCTGCTACGCTT | CCCCTGACTCATTTACTACAAC |
| -A2.2-3 | chr3B | 2160266 | 2163289 | TGGACTTATGCTCGGTGT | GCCGAATGAGGACCAGAT |
| S+A1 | +A1-1 | chr3B | 2645663 | 2648650 | CCTCTGTGGCGTACAACT | CACCATCTAGCCCTCATG |
| +A1-2 | chr3B | 2650450 | 2653159 | CAGCCACCCGGACAAGAAC | TCATGGTCAGTCATAGCAAGCC |
| S-A3 | -A3-1 | chr3B | 4388982 | 4391720 | ACAGGCCAGTTTCGACACAA | GAAACCGGCCCTTTTCCCTA |
| S-A5 | -A5-1 | chr3B | 11316078 | 11318853 | ACAGGCCAGTTTCGACACAA | GAAACCGGCCCTTTTCCCTA |
| S+A2 | +A2-1 | chr3B | 17656585 | 17659500 | AGTACGGGTACGTGCAAGC | CCACTCCAGAGCGTCAATG |
| +A2-2 | chr3B | 17661511 | 17663842 | AACCCTCTGTTTCTTTGA | GGAATTTACTGGGGAATG |
| +A2-3 | chr3B | 17663794 | 17666065 | CCGTACTGTCATCGCTCT | GGCTCGGTGCTTCTTATA |
| S+A3.1 | +A3.1-1 | chr3B | 74524452 | 74527473 | TAGTAACTGCGGATGTTT | CTGTTTCCCCTGCCTGAC |
| +A3.1-2 | chr3B | 74530229 | 74533295 | AGACAAAGCATACTACCAA | ATCAGAACAAGCAGAATAG |
| S+A3.2 | +A3.2-1 | chr3B | 74679545 | 74682519 | TTGATAAGAGCCTTAGAGG | GCGGAATATGAGCCAGAA |
| +A3.2-2 | chr3B | 74682942 | 74685816 | GCGGCTAGATTCCCTGTC | CTTATCGGTGGTATTGGTG |
| S38M | S38M-1 | chr3B | 47618953 | 47621003 | CATGACTGGGGCGGTGAA | GGGGTGTATCATGAATCATTCGG |
| S38M-2 | chr3B | 47621444 | 47623494 | GCGACACATTCCCTTCCAAC | ACCTTACAAGTTACACCATCCTT |
